# Supplementary material for: Incidence of Respiratory Syncytial Virus Infection in Older Adults Before and During the COVID-19 Pandemic
Source: PubMed Central journal article supplement — JAMA Netw Open. 2023 Jan 20;6(1):e2250634. doi: 10.1001/jamanetworkopen.2022.50634 (PMC9860520; doi:10.1001/jamanetworkopen.2022.50634), 2023-01-20
Supplement: jamanetwopen-e2250634-s002.pdf [file jamanetwopen-e2250634-s002.pdf]

## Data Sharing Statement

Juhn. Incidence of Respiratory Syncytial Virus Infection in Older Adults Before and During the COVID-19 Pandemic. *JAMA Netw Open*. Published January 20, 2023.  
doi:10.1001/jamanetworkopen.2022.50634

### Data

**Data available:** No
